# Supplementary material
Source: Springer Nature journal article supplement (https://www.springermedizin.de/resource/supplementary/12885_2010_2531_MOESM9_ESM.pdf/9462230)

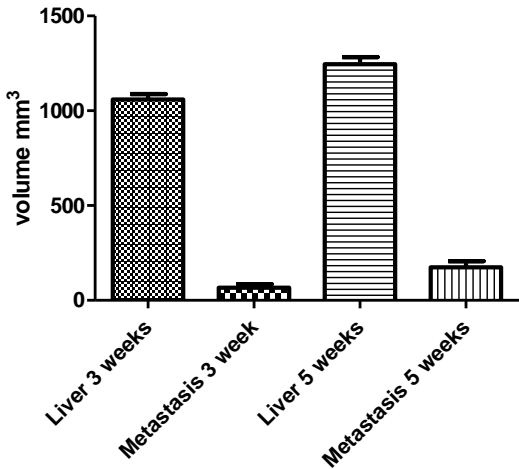

Liver to Livermetastasis Volume 3 and 5 weeks

Supplement: MOESM9 [file 9462230]
